# Supplementary material for: Genome-Wide Association Study of Body Conformation Traits by Whole Genome Sequencing in Dazu Black Goats
Source: MDPI journal article supplement (doi:10.3390/ani12050548), 2022-02-23

Body height

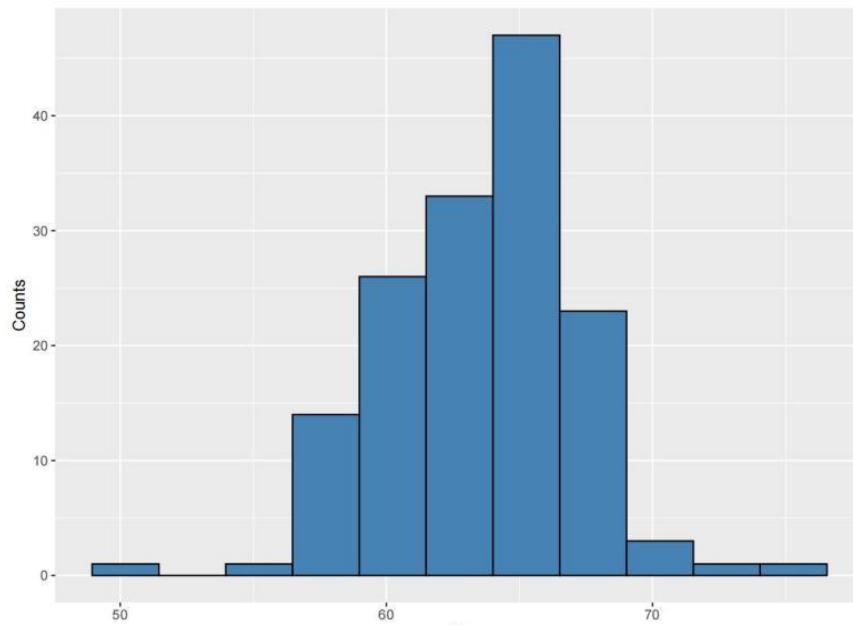

Normal\_test\_QQ

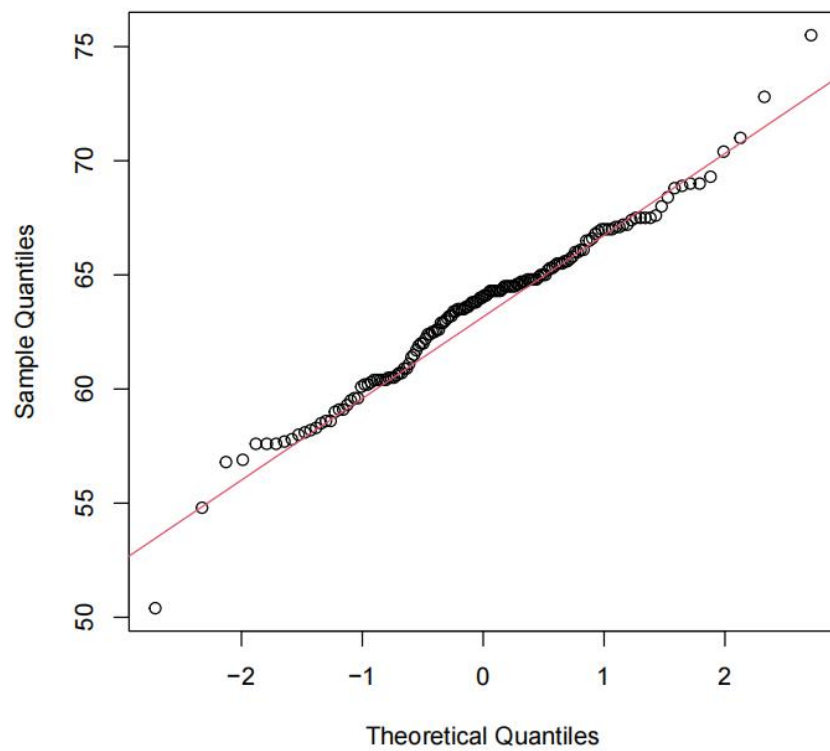

Body length

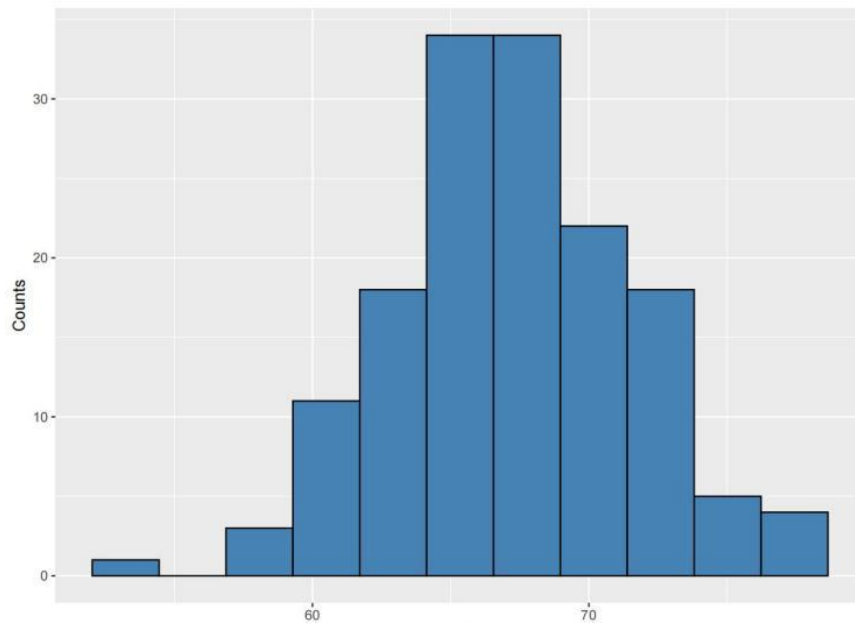

Normal\_test\_QQ

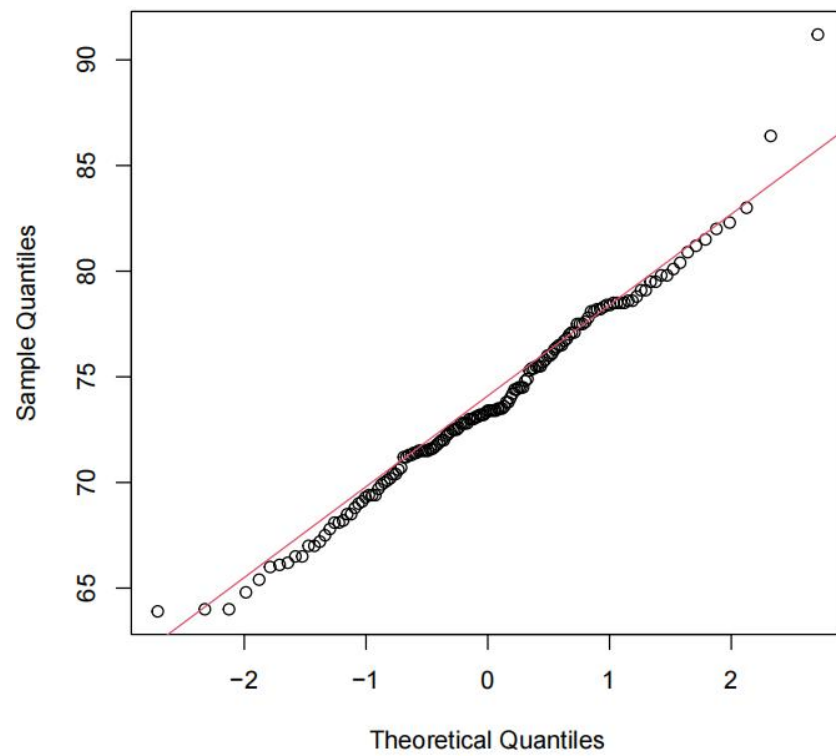

Cannon Circumference

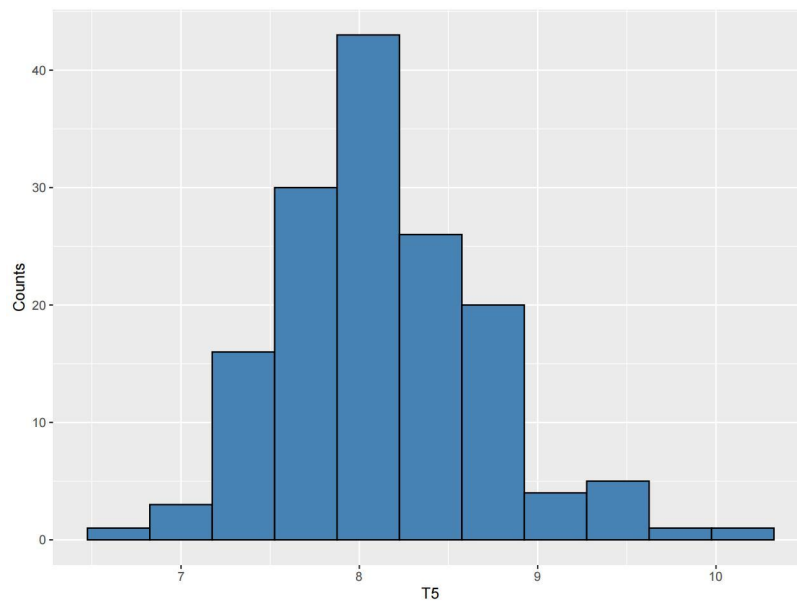

Normal\_test\_QQ

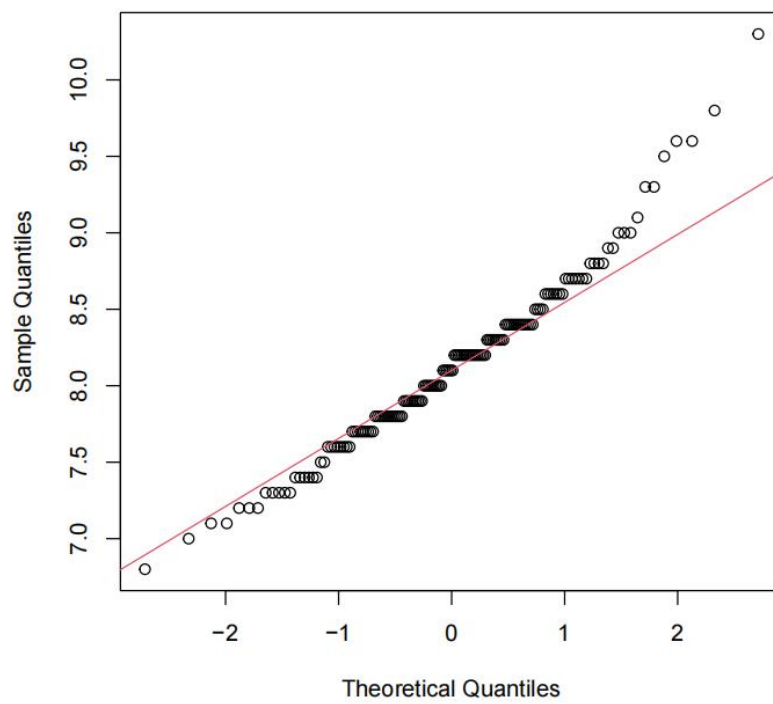

Chest Depth

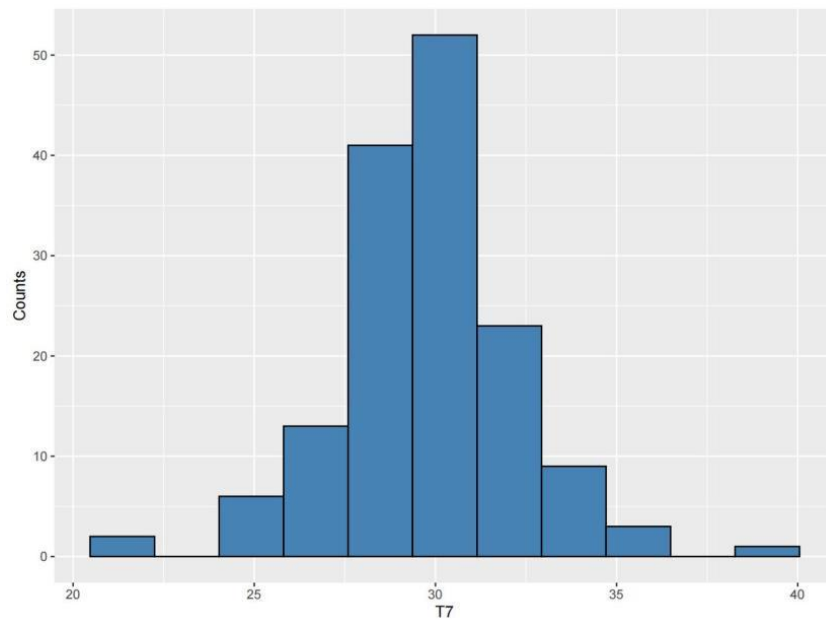

Normal\_test\_QQ

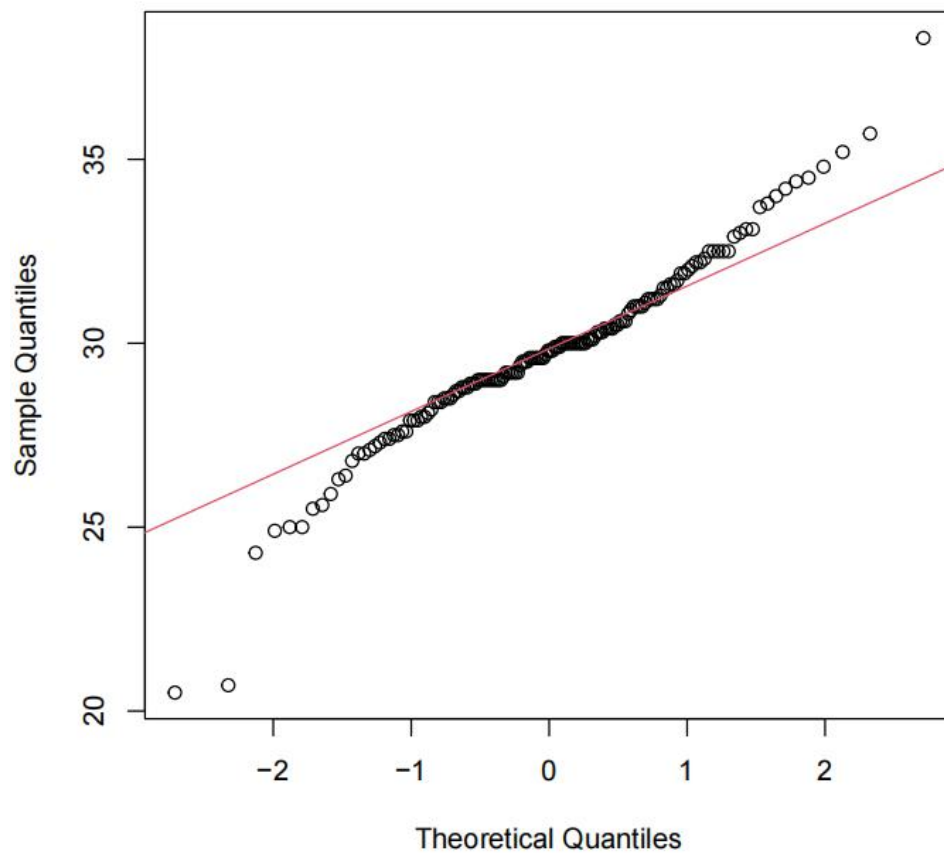

Chest Width

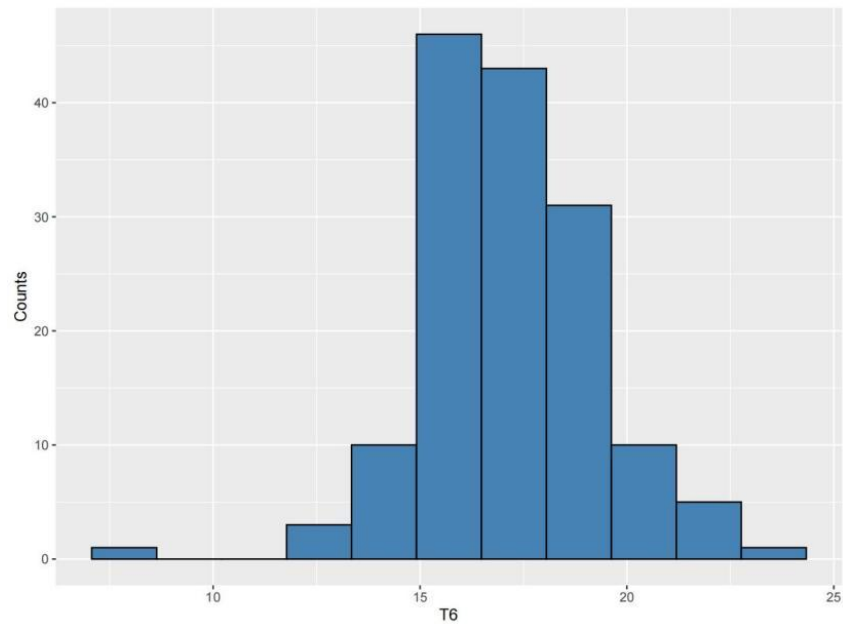

Normal\_test\_QQ

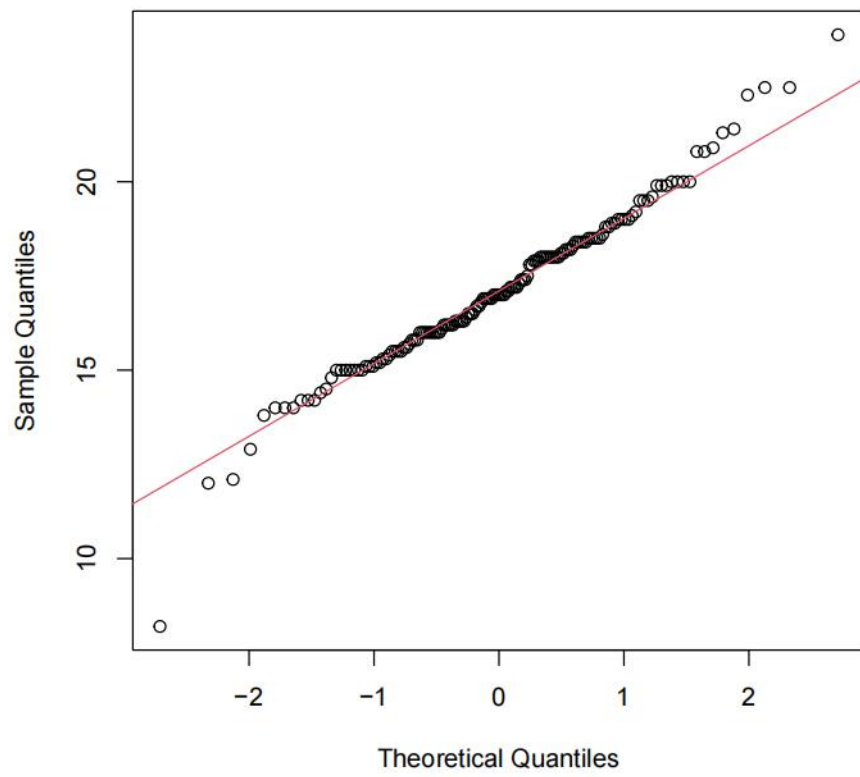

Heart Girth

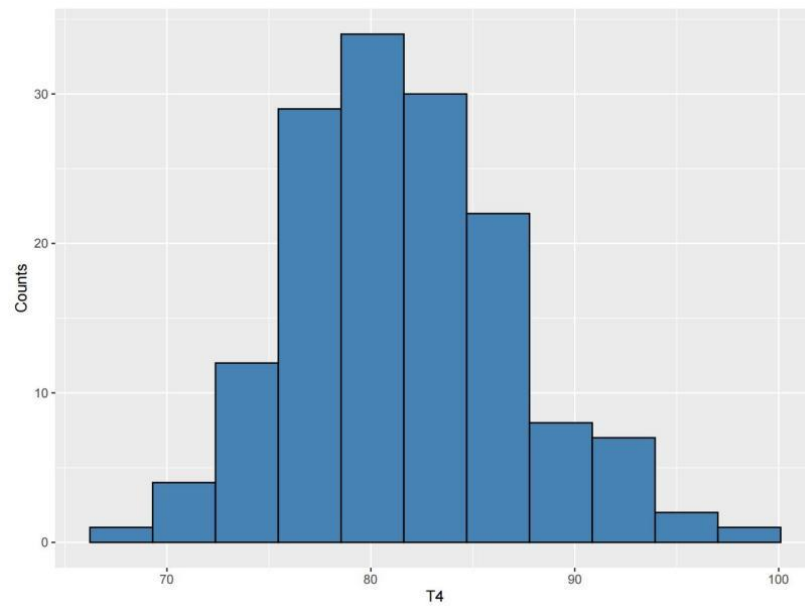

Normal\_test\_QQ

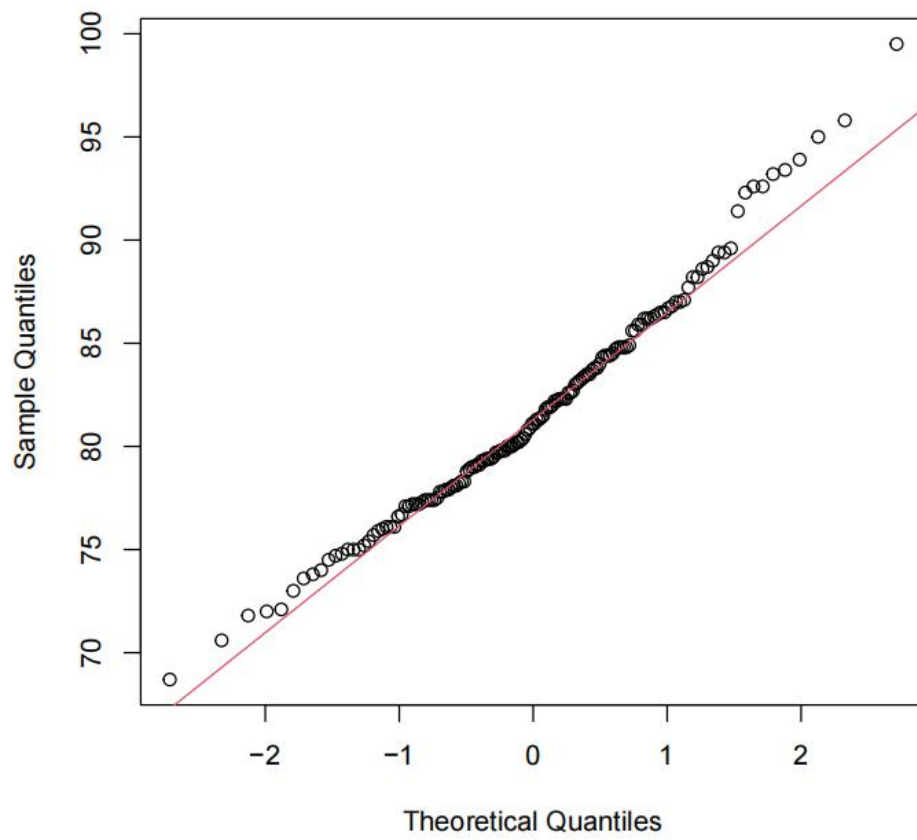

Supplement: s1 [file s1]
