# Supplementary material for: Genome-Wide Association Study of Body Conformation Traits by Whole Genome Sequencing in Dazu Black Goats
Source: MDPI journal article supplement (doi:10.3390/ani12050548), 2022-02-23
Supplement: s1 [file s1]

#### Body height:

The vertical distance from the highest point of the scapula to the ground when the measured goat stands upright on a firm and flat surface. Measurements were taken in cm and results were retained to one decimal place. Measurements were made with a calipers.

#### Body length:

The distance from the Sternum to the posterior end of the sciatic tuberosity in a straight line when the measured goat stands upright on a firm and flat surface. Measurements were taken in cm and results were retained to one decimal place. Measurements were made with a calipers.

#### Cannon circumference:

The horizontal circumference of the thinnest part of the left forelimb tuberosity when the measured goat stands upright on a firm and flat surface. Measurements were taken in cm and results were retained to one decimal place. Measurements were made with a tape measure.

#### Chest depth:

The vertical distance from the highest point of the scapula to the Sternum when the measured goat stands upright on a firm and flat surface. Measurements were taken in cm and results were retained to one decimal place. Measurements were made with a calipers.

#### Chest width:

The straight line distance between the left and right sides of the widest part of the scapula when the measured goat stands upright on a firm and flat surface. Measurements were taken in cm and results were retained to one decimal place. Measurements were made with a calipers.

#### Heart girth:

The length of the posterior end of the scapula around the chest when the measured goat stands upright on a firm and flat surface. Measurements were taken in cm and results were retained to one decimal place. Measurements were made with a tape measure.
