# Supplementary figures and images for: Genome-Wide Association Study of Body Conformation Traits by Whole Genome Sequencing in Dazu Black Goats
Source: MDPI journal article supplement (doi:10.3390/ani12050548), 2022-02-23

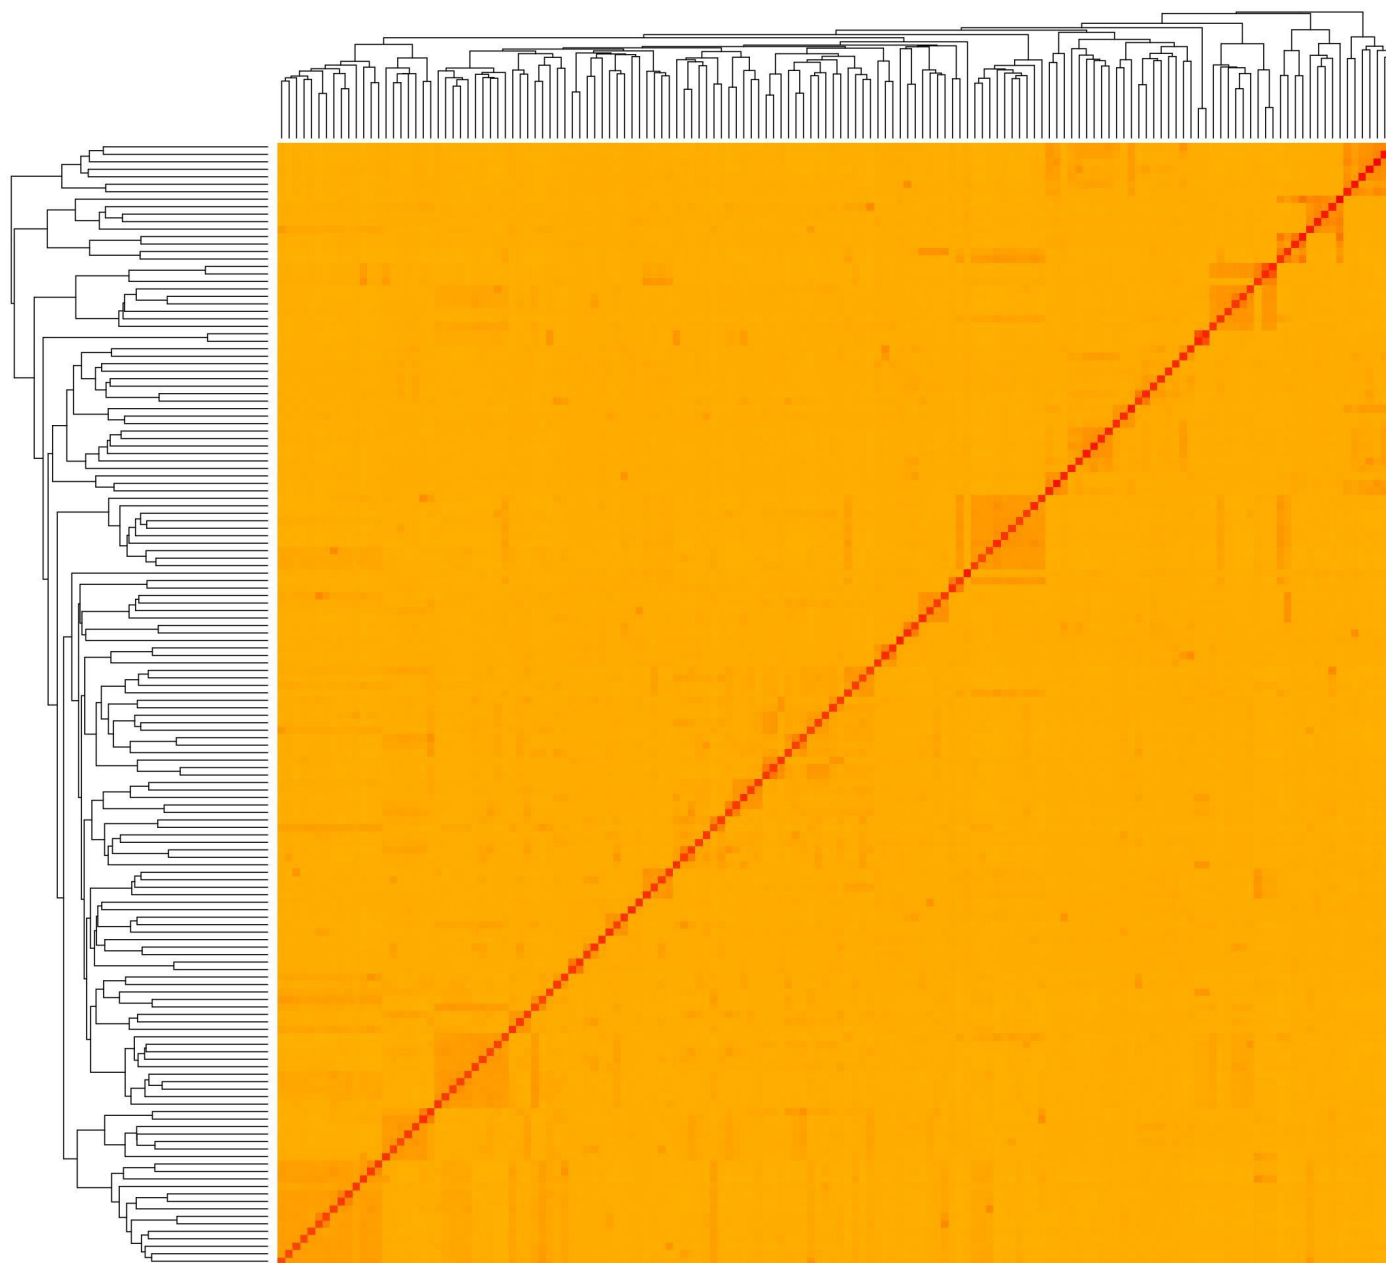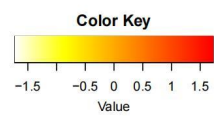

Supplement: s1 [file s1]
